1 **Predicting drug resistance evolution: insights from antimicrobial peptides and**  
2 **antibiotics**

3

4

5

6

7 **Authors:**

8 Guozhi Yu<sup>a#</sup>, Desiree Y Baeder<sup>b#</sup>, Roland R Regoes<sup>b,\*</sup>, Jens Rolff<sup>a,c,\*</sup>

9

10 Evolutionary Biology, Institut für Biologie, Freie Universität Berlin, Koenigin-Luise  
11 Str. 1-3, 14195 Berlin, Germany<sup>a</sup>; Institute of Integrative Biology, Universitätsstr. 16  
12 ETH Zurich, 8092 Zurich, Switzerland<sup>b</sup>; Berlin-Brandenburg Institute of Advanced  
13 Biodiversity Research (BBIB),14195 Berlin, Germany<sup>c</sup>

14 <sup>#</sup>shared first authors

15 <sup>\*</sup>corresponding authors: [roland.regoes@env.ethz.ch](mailto:roland.regoes@env.ethz.ch), [jens.rolff@fu-berlin.de](mailto:jens.rolff@fu-berlin.de)

16

17 Keywords: resistance evolution, antibiotics, antimicrobial peptides,

18 pharmacodynamics

19

20

21 **Abstract**

22

23 Antibiotic resistance constitutes one of the most pressing public health concerns.

24 Antimicrobial peptides of multicellular organisms are considered part of a solution to

25 this problem, and AMPs produced by bacteria such as colistin are last resort drugs.

26 Importantly, antimicrobial peptides differ from many antibiotics in their

27 pharmacodynamic characteristics. Here we implement these differences within a

28 theoretical framework to predict the evolution of resistance against antimicrobial

29 peptides and compare it to antibiotic resistance. Our analysis of resistance evolution

30 finds that pharmacodynamic differences all combine to produce a much lower

31 probability that resistance will evolve against antimicrobial peptides. The finding can

32 be generalized to all drugs with pharmacodynamics similar to AMPs.

33 Pharmacodynamic concepts are familiar to most practitioners of medical

34 microbiology, and data can be easily obtained for any drug or drug combination. Our

35 theoretical and conceptual framework is therefore widely applicable and can help

36 avoid resistance evolution if implemented in antibiotic stewardship schemes or the

37 rational choice of new drug candidates.

38

39

40

41 Antibiotic resistance is prevalent (1) and evolves quickly. It takes only a few years  
42 from the introduction of a new antibiotic to the clinic until resistant strains emerge(2).  
43 Prudent use and the introduction and development of novel antibiotics are currently  
44 considered to be the most effective ways to tackle resistance evolution(3). The  
45 prediction of when and how antibiotic resistance evolves and spreads is notoriously  
46 difficult, but would be extremely informative for antibiotic stewardship and the  
47 development of new drugs.

48 Amongst the new drugs under development are antimicrobial peptides (AMPs)(4).  
49 AMPs are peptides that have spatially explicit hydrophobic and cationic residues(5).  
50 Note that for example polymixins (including colistin) are usually subsumed under  
51 antibiotics, also fall into this category as they are AMPs of bacterial origin(6),(7). One  
52 of the alleged advantages of AMPs is that bacterial resistance would evolve much  
53 more slowly than against antibiotics(5, 8), a highly desirable property(9).

54 We have recently demonstrated that AMPs from multicellular organisms affect  
55 growing bacterial populations differently from antibiotics, i.e. they differ in their  
56 pharmacodynamics (or dose-response relationship)(10). A similar observation has  
57 been reported for colistin a last resort drug to treat *Pseudomonas* infections(11)  
58 .Pharmacodynamic characteristics of susceptible and resistant bacterial strains can be  
59 used to illustrate the selection of resistance under treatment with range of  
60 dosage(12).Such application is based on the concept of the ‘mutant selection window’  
61 (MSW, Fig 1)(13, 14). The MSW has been successfully applied in animal models,  
62 demonstrating its value to understand resistance emergence *in vivo*(15).

63 The width of the mutant selection window is partly determined by the steepness of the  
64 pharmacodynamic curve (see Fig 1). Importantly the concentration range between no  
65 killing and maximal killing is much narrower for AMPs than antibiotics, resulting in a  
66 much steeper curve. The maximum killing rate of AMPs is much higher than of  
67 antibiotics, as reflected in quicker killing time(16). Another difference relevant to the  
68 evolution of resistance is the finding that many antibiotics increase mutation rates of  
69 bacteria(17, 18),(19), but the AMPs tested so far do not show such an effect as they  
70 do not elicit bacterial DNA damage responses (17, 18).

71 Here we use a pharmacodynamics approach that has been widely used to describe  
72 sigmoid dose-response relationships (20, 21),(22, 23) to study the evolution of  
73 resistance of a homogeneous population. Our work uses the formulation of  
74 pharmacodynamic function from Regoes et al(20). We particularly explored how the  
75 steepness of the pharmacodynamic curve (described by the the Hill coefficient  $\kappa$ ),  
76 together with other pharmacodynamic parameters determine the probability of  
77 resistance evolution(20). The potential importance of the Hill coefficient  $\kappa$  is often  
78 overlooked in many pharmacodynamic models, where it simply set to 1 for all  
79 drugs(24). Recent work includes the Hill coefficient (25, 26), indicating the  
80 importance of this pharmacodynamic parameter.

81 We use this approach with different parameter values for  $\kappa$ , derived from empirical  
82 data, as this allows us to calculate the size of the mutant selection window that  
83 generalizes over all possible resistant strains. Gullberg *et al.* demonstrated(14) that  
84 resistant mutants are already under positive selection below the MIC (minimum  
85 inhibitory concentration) of the susceptible strain. We therefore use the mutant  
86 selection concentration (MSC, Fig 1A) as the lower boundary, not the MIC of the  
87 sensitive strain that was used previously(12, 13). Using empirical parameter estimates

88 for AMPs and antibiotics, we show that the probability of resistance evolution against  
89 AMPs (or any drug with similar pharmacodynamics properties) is much lower than  
90 for antibiotics. We therefore provide a robust and generalizable predictive framework  
91 for studying the evolution of drug resistance. This is particularly useful to apply when  
92 new drugs are introduced, i.e. before resistance has evolved.

93

94

## 95 **Results**

96

97 The mutant selection window (Fig 1) shows the concentration of an antimicrobial  
98 under which susceptible strains are suppressed, but resistant strains can still grow(13).  
99 We show that the lower bound of the mutant selection window (MSC) can be  
100 calculated based solely on the pharmacodynamics of the susceptible strains and the  
101 costs of resistance (Fig 1A, Fig 2A, equation 3). The cost is defined here as the  
102 reduction of growth rate in a drug free environment.

103

104 The pharmacodynamics of AMPs and antibiotics differ significantly(10): the  
105 pharmacodynamic curves of AMPs are much steeper as captured by a higher Hill  
106 coefficient  $\kappa$  (see Fig 2A); the step from a concentration with no effect to a killing  
107 concentration is therefore much smaller. This feature is likely due to a higher number  
108 of “hits” that AMPs need to deliver to bacteria to kill them and perhaps cooperative  
109 binding of AMPs molecules to the cell membrane(27). This results in a narrower  
110 MSW for AMPs than antibiotics The MSW opens at lower concentrations when the  
111 costs of resistance are low. Our re-analysis of data on antibiotic resistance against a  
112 variety of antibiotics in a number of different bacterial species (data from(28)) shows

113 that the upper bound of the MSW correlates with the cost of resistance (Fig 2B).  
114 Taken together we are now in a position to estimate the size of the MSW for any  
115 drug, if estimates of pharmacodynamic parameters based on the sensitive strains,  
116 including the MIC, the maximum effect and the steepness of the pharmacodynamics  
117 curve are available (Fig 1A, Fig 2C).

118

119 Next we wanted to explore if the differences between AMPs and antibiotics in the  
120 width of the MSW correlated with different probabilities of drug resistance evolution  
121 within a host. A further difference between AMPs and antibiotics is that some  
122 antibiotics increase mutagenesis but AMPs do not(17, 18). We incorporated this  
123 difference in addition to the difference in the steepness of the pharmacodynamics  
124 relationship into a stochastic model describing bacterial replication and evolution  
125 under selection pressure from AMPs. We consider two cases here: (a) do resistant  
126 mutants emerge (answering this question requires a stochastic model) and (b) do  
127 resistant mutants drive the susceptible strains to extinction?

128

129 We find that resistance emerges with a much higher probability for the parameter  
130 settings of antibiotics (top row Fig 3B) than for AMPs in our simulations (bottom row  
131 Fig 3B, Fig 3A). All intermediate cases, where we simulated changes in one or two of  
132 the parameters  $\kappa$  mutation rate and maximum effect, also reduce the probability of  
133 resistance emergence compared to ‘pure’ antibiotics.

134 We also find that resistant mutants are much more likely to drive the susceptible  
135 bacterial populations to extinction under antibiotic than under AMP treatment (Fig 3  
136 B). Again, this result also holds when we study intermediate cases. In summary, our  
137 results show that the application of drugs with low  $\kappa$ , mutation elevation and low

138 maximum effect, i.e. characteristics found in most common antibiotics, inherently  
139 bears a high risk of causing the evolution of resistance.

140 We have shown before(10) that combinations of AMPs have higher  $\kappa$  and lower MICs  
141 than individual AMPs. This also results in differences in resistance selection and the  
142 extinction of susceptible strains, consistent with the results above.

143

144 Day *et al* (29) provided an approach to calculate a resistance hazard: a measure that  
145 combines the time of resistance emergence and its selection within a host. We  
146 calculated similar resistance hazard for AMPs in comparison to antibiotics. The  
147 simulation results show (Fig 3C) that the hazard is much higher and the concentration  
148 range much wider under antibiotic treatment than under AMP treatment. Also, when  
149 resistance evolves, it emerges earlier in the antibiotic scenario than in the AMP  
150 scenario at low concentrations (Fig 3D). In certain concentrations (for example,  
151 around MIC in our simulation), resistance emerges earlier in AMP than in antibiotics  
152 (Fig 3D). Time of emergence is mostly affected by  $\kappa$  and mutation rate: higher  $\kappa$  and  
153 lower mutation rate, the latter more important when population sizes are small, confer  
154 delayed resistance emergency (Fig S4).

155

156

## 157 **Discussion**

158 Our predictions suggest that AMPs, or in fact any antimicrobial drug with similar  
159 pharmacodynamics, are much less likely to select drug-resistant mutants than  
160 antimicrobials with antibiotic-like characteristics. Our theory is blind to the molecular  
161 mechanism of action but captures the dynamically relevant aspects of action.

162 We assume that pharmacodynamics and mutagenic properties of AMPs are  
163 significantly different from antibiotics. This assumption is based on limited data of  
164 AMPs in the literature(10, 17). More experiments with a variety of antimicrobial  
165 peptides are needed to determine if AMP like characteristics can be indeed  
166 generalized and if these characteristics are significant different from antibiotics.

167

168 In the light of our results, increasing  $\kappa$  and/or the maximum effect are desirable for  
169 any drug as well as advantageous to hosts managing their microbiota using AMPs.  
170 Our model therefore provides useful information for the development of new  
171 antimicrobial drugs: higher  $\kappa$  and maximum effect will impose much weaker selection  
172 on the bacteria to evolve resistance in lower concentrations, and clear the bacterial  
173 population more quickly in higher concentration which will, in turn, reduce the  
174 probability of resistance emergence. Currently mostly AMPs display these properties,  
175 but it is likely that new antibiotics that target the cell membrane or wall display  
176 similar pharmacodynamics.

177

178 The smaller MSW under AMPs is a direct consequence of the steeper  
179 pharmacodynamic functions(10). It is important to note that this relationship hinges  
180 on the realization that the window opens at the concentration at which the resistant  
181 strains have a higher growth rate than the sensitive strain, well below the MIC of the  
182 sensitive strain(14). Thus, a high Hill coefficient ( $\kappa$ ) would constitute a promising  
183 characteristic of new antimicrobials. The other characteristics in which AMPs differ  
184 from antibiotics – mutagenesis and maximum effect – affect mostly the time until  
185 resistance emerges, but not the size of the MSW. Because this time becomes shorter



186 with higher population sizes, these characteristics may have less significance for  
187 clinical infections (30).

188

189 We find that time to resistance emergence in AMPs is longer than in antibiotics when  
190 the concentration is low (subMIC). Around MIC resistance against AMPs seems to  
191 emerge quicker than against antibiotics (FIG D). This counterintuitive result is  
192 explained by the fast removal of the sensitive strains caused by the combination of  
193 high  $\kappa$  and low  $p_{\text{simin}}$  and is not related to the mutation rate *per se*. Overall the  
194 probability of resistance emergence is lower for AMPs as higher concentrations  
195 quickly remove the sensitive population. Chevereau *et al.*(31) reached a different  
196 conclusion using a different modeling approach. They modeled the  
197 pharmacodynamics only for positive growth and continuously adjusted the drug  
198 concentration to maintain the overall growth rate at half of the maximal in the  
199 simulation. In this scenario, drugs with sensitive dose-response would facilitate  
200 evolution due to the wide distribution of fitness, a scenario that seems unlikely in real  
201 antimicrobial treatment.

202

203 One recommendation derived from our modeling approach is that drugs that show  
204 pharmacodynamics resembling AMPs should be good candidates for slowing the  
205 evolution of resistance. Interestingly, combinations of AMPs result in increased  $\kappa$ ,  
206 which our model predicts to bear lower risks of evolution of resistance(10). It is often  
207 argued that combination therapy reduces resistance evolution (but also see (32)), as it  
208 is supposedly more difficult to evolve resistance against more than one mechanism at  
209 a time. Our approach indicates that combination therapy might even prove effective if

210 there are mutations that confer complete cross-resistance to the drugs in the  
211 combination.

212

213 It has been proposed that bacterial resistance evolution against AMPs is highly  
214 unlikely (5, 8). Yet, *in vitro* experimental evolution has demonstrated that resistance  
215 to AMPs can arise (33–35) and AMP-resistance mechanisms have been characterized  
216 (36). Against antibiotics, resistance can increase the MIC by 2-3 orders of magnitude  
217 in a relatively small bacterial population(37), a range that has not been observed for  
218 AMPs. Though AMPs provide promising leads for drug development (4), their  
219 conserved killing mechanisms also argue for caution. In their paper ‘arming the  
220 enemy’, Bell et al.(38) discussed the high likelihood of cross-resistance against, for  
221 example, human AMPs. This problem has hardly been studied. Our analysis suggests  
222 how one could reap the benefits of AMPs without arming the enemy: we should rely  
223 on agents with AMP-like pharmacodynamics. This in principle can be adopted  
224 without using AMPs themselves.

225

226 Pharmacodynamic estimates can be easily and routinely obtained from time-kill  
227 curves. This can also be achieved for drug combinations(10). A report by the  
228 *Leopoldina*, the German National Academy of Sciences, recently recommended to  
229 use new drugs only in combination to avoid fast resistance evolution(39). The  
230 scientific support for this notion is limited and controversial(32, 40, 41). In clinical  
231 situations pharmacodynamic approaches can provide a first informed guess. Also, the  
232 risk of resistance evolution based on the pharmacodynamics of drug candidates will  
233 be a useful additional criterion to develop new drugs. We would also like to note that  
234 the concept of the mutant selection window has been applied to understand antiviral

235 resistance evolution(42), and hence our approach has the potential to inform antiviral  
236 resistance research and ultimately treatment as well.

237 In order to generate predictions on resistance evolution based on pharmacodynamics,  
238 one of our main goals of the project, we made a number of simplifying assumptions.

239 The pharmacodynamics are based on data of initial killing only. Moreover, we  
240 assume homogeneous populations over time and space. Expanding the framework to  
241 integrate tolerance and resistance is possible but would require pharmacodynamic  
242 estimates and additional functions. Another possible extension of our work would be  
243 to include pharmacodynamic estimates of resistant strains that change over time due  
244 to compensatory mutations and to cross resistance or collateral sensitivity when  
245 exposed to combinations of antimicrobials. Finally, we assumed the same  
246 pharmacokinetics for all cases in our study. As AMPs are currently rarely used  
247 (Colistin being the notable exception), future empirical work will inform realistic  
248 parameter estimates for pharmacokinetics. In all cases however, the basis of any  
249 analysis concerning resistance evolution is the influence of individual  
250 pharmacodynamic parameters, for which we provide a framework.

251

252

253

254

## 255 **Materials and Methods**

256 For the parameterization of the predictive models, we used two main sources. The  
257 pharmacodynamic parameters are taken from one of our own studies that determines  
258 pharmacodynamics for AMPs and antibiotics under standardized conditions(10). In  
259 short, time kill experiments with different AMP concentrations were conducted and

260 the slopes of the linear regressions were used to calculate the parameters of the  
261 pharmacodynamic function. Here, we only took into account the initial kill rates and  
262 assumed a homogeneous population structure. The estimates of mutation rates again  
263 are from our own comparative study on mutagenesis under AMP and AB  
264 treatment(17) .

265

### 266 *Calculation of the size of the mutant selection window*

267 The size of the mutant selection window (MSW) depends on the lower and upper  
268 bound of the MSW and is calculated as

$$269 \quad size_{MSW} = \frac{MIC_R}{MSC}. \quad (0)$$

270 The lower bound of the MSW is the concentration for which the net growth rate of the  
271 resistant strain is equal to the net growth rate sensitive strain and is called the minimal  
272 selective concentration (MSC). The upper bound of the MSW is the MIC of the  
273 resistant strain ( $MIC_R$ ) (Fig 1 A).

274 To analytically describe the MSW, we use the pharmacodynamic (PD) function  $\psi(a)$ ,  
275 which mathematically describes the net growth rate with a Hill function:

$$276 \quad \begin{aligned} \psi(a) &= \psi_{max} - d(a) \\ &= \psi_{max} - \frac{(\psi_{max} - \psi_{min})(a / MIC)^\kappa}{(a / MIC)^\kappa + \psi_{min} / \psi_{max}} \end{aligned} \quad (0)$$

277

278 ((10, 20, 21)). Here,  $a$  is the antimicrobial drug concentration,  $\psi(a = 0) = \psi_{max}$ ,  $d(a)$  is  
279 the effect of the antimicrobial with the dose  $a$ , and  $\psi(a \rightarrow \infty) = \psi_{min}$ . Therefore, the  
280 maximal effect  $E_{max}$  is  $E_{max} = \psi_{max} - \psi_{min}$ . The parameter  $MIC$  denotes the  
281 concentration that results in zero net growth (this definition differs from the "official"  
282 MIC definition by Mouton et al (43)). The Hill coefficient  $\kappa$  describes the steepness of  
283 the curve; functions with higher  $\kappa$  describe steeper curves (Fig 2A). For illustration of

284 the pharmacodynamic parameters see Fig S3). Cost of resistance  $c$  is included as a  
285 reduction of the maximum growth rate of the resistant strain in absence of  
286 antimicrobials with  $c = 1 - \psi_{max,R} / \psi_{max,S}$  (Fig 1A, 2A). The pharmacodynamic  
287 function can be described for both a drug susceptible strain  $S$  and a drug-resistant  
288 strain  $R$ , with  $\psi_S(a)$  and  $\psi_R(a)$ , respectively. The  $MSC$  is calculated as  $\psi_S(a) = \psi_R(a)$ .  
289 We assume that the net growth rate of the resistant strain below the  $MSC$  is, for any  
290 given concentration  $a$ , with  $0 < a < MSC$ , approximately at the same level as without  
291 antimicrobials and therefore we set  $\psi_R(a) \approx \psi_{R,approx}$  (illustrated in Fig 2A). With  
292  $\psi_{R,approx} = \psi_{max,R} = \psi_{max,S}(1-c)$ , we are able to describe the net growth rate of the  
293 resistant strain with the net growth rate of the sensitive strain  $\psi_{max,S}$  and the costs of  
294 resistance  $c$ :  $\psi_R(a) \approx \psi_{R,approx} = \psi_{max,S}(1-c)$ . This is valid because  $MIC_R \gg MIC_S$  and  
295 assuming  $\kappa_R \gg \kappa_S$ . The analytic solution of the  $MSC$  is

$$296 \quad MSC = MIC_S \left( \frac{c\psi_{min,S}}{\psi_{max,S}(c-1) + \psi_{min,S}} \right)^{1/\kappa_S}. \quad (0)$$

297  
298 *Analysis of the relationship between cost of resistance  $c$  and  $MIC_R$*

299 Data(44) determining relationship between fitness of resistant strains and  
300  $MIC_R/MIC_S$  was re-analyzed. The dataset contained information about increase of  
301 MIC due to resistance and fitness of the resistant strain. The dataset summarizes  
302 cases of bacterial resistance to antibiotics. Similar data for AMPs have been  
303 compiled recently(30) but are yet too scarce to include in the following analysis.  
304 We therefore assumed similar relationships for both antibiotics and AMPs.  
305 We calculated cost of resistance  $c$  as  $c = 1 - \text{fitness}$ , using  $n = 128$  observations  
306 compiled in the mentioned dataset. Fitting a  $\log_{10}$  transformed linear regression  
307 to the data resulted in the parameterized function  $\log_{10}(MIC_R/MIC_S) = 2,59 * c +$

308 1,65, ( $R^2 = 0.22$ ). The data was then resampled with using bootstrapping to (i)  
309 determine the 95% confidence interval of log-linear regression of the data as  
310 interval, where 95 % of the regression fall into (see fig. 2B) and (ii) to include the  
311 variance of the data when determining the size of the mutant selection window  
312 (MSW)(see fig. 2C). For the latter, the given dataset was fitted to the mentioned  
313 log-linear regression 200 times, resulting in 200 parameter sets for the  
314 regression. Each parameter set was then used to calculate the size of the MSW  
315 depending on the cost of resistance. The 95% confidence interval was then  
316 calculated as the interval, in which 95% of the calculated size of the MSW are in  
317 for a given cost.

318

### 319 *Model of evolution and prediction of resistance*

320 To study resistance evolution we used a mathematical model that incorporates  
321 pharmacodynamics (PD) and pharmacokinetics (PK) and captures population  
322 dynamics of bacterial populations under treatment with antimicrobial drugs(20). We  
323 ran stochastic simulations to calculate the probability of resistance emergence, the  
324 probability of the resistant strain, the time to resistance emergence and the risk of  
325 resistance (the resistance hazard(29)).

326

327 To simulate treatment, we consider a patient harboring  $10^6$  susceptible bacteria.  
328 Bacterial mutation rates are assumed to depend on the antimicrobial used for  
329 treatment (antibiotics or AMPs). When a resistant strain arises it is assumed to have  
330 an MIC ten-fold that of susceptible wild-type strain. For simplicity, we only consider  
331 one type of mutant. Antimicrobials are administered every day (see Supplement for  
332 pharmacokinetics), and treatment lasts one week.

333 The population dynamics of the susceptible and resistant strains is captured in the  
 334 following system of differential equations:

335

$$\begin{aligned}
 \frac{dS}{dt} &= r_S (1 - \mu) S \left( 1 - \frac{S + R}{K} \right) - [d_S + d_n] S \\
 \frac{dR}{dt} &= r_R R \left( 1 - \frac{S + R}{K} \right) + \mu r_S S \left( 1 - \frac{S + R}{K} \right) - [d_R + d_n] R.
 \end{aligned}
 \tag{0}$$

337

338

339 Where  $S$  represents the wild-type strain and  $R$  represents the resistant strain. The  
 340 maximum net growth rate  $\psi_{max}$  is the difference between the replication rate  $r$  and the  
 341 intrinsic death rate  $d_n$ :  $\psi_{max} = r - d_n$ .  $\mu$  is the mutation rate.

342

343 To include the change of antimicrobial concentrations over time (pharmacokinetics)  
 344 into our model, we define the death rate to be dependent on the time-dependent  
 345 antimicrobial concentration  $a(t)$ :

$$d_i(a(t)) = \frac{(\psi_{max} - \psi_{min})(a(t)/MIC)^K}{(a(t)/MIC)^K - \psi_{min}/\psi_{max}}, \quad i = S, R \tag{0}$$

347

348 We assume a time-dependent pharmacokinetic function  $a(t)$  of the following form  
 349 (see also Fig S2):

$$a(t) = \sum_n \frac{Dk_a}{k_a - k_e} \left( e^{-k_e[t-(n-1)\tau]} - e^{-k_a[t-(n-1)\tau]} \right), \quad n = 1, 2, 3K$$

351

352

353 Here,  $k_a$  is the absorption rate, and  $k_e$  is the decay rate.  $D$  is the dose given each time,  
 354  $n$  is the number of doses,  $\tau$  is the dosing frequency. We define the treatment dose as  
 355 the average concentration in the course of treatment:

$$\bar{a} = \frac{1}{t} \int a(t) dt \tag{0}$$

357

358 We implemented the model in Equation 4 stochastically using the Gillespie  
359 algorithm(45), which allowed us to monitor how frequently mutants arise. Parameters  
360 were selected based on empirical data as stated above. The net growth rate of wild-  
361 type in the absence of antimicrobials was set as 1. Mutants suffer fixed or resistant-  
362 level related costs (see Fig 2).  $\kappa$  of AMPs and antibiotics were set as 5 and 1.5,  
363 respectively (10).  $\psi_{\min}$  for AMPs is fixed as  $-50 \text{ hour}^{-1}$ ; and for antibiotics is fixed as -  
364  $5 \text{ hour}^{-1}$ . Mutation rates in AMPs are assumed to be three times lower than in  
365 antibiotics, in accordance with our empirical estimates (17). All the parameters and  
366 their values are listed in Table S1. All the pharmacokinetic parameters are the same in  
367 different simulations (see Fig S2). For each set of parameters, cohorts of five hundred  
368 infected individuals were simulated. Successful treatment is defined as complete  
369 clearance of both sensitive and resistant strains at the end of the one-week treatment.  
370 For each cohort, we calculate the probability of treatment success as the proportion of  
371 individuals in whom treatment was successful. In each individual, we score the time  
372 of emergence of resistance strains, and estimate the resistance hazard based on the  
373 average probability of treatment success and the population size of bacteria over time.  
374 The hazard function can be written as,

$$375 \quad H(a, t) = \frac{1}{Kt} \int S(a, t) p_{S \rightarrow R}(a) \psi_R(a) dt, \quad (0)$$

376 where  $K$  is the capacity,  $S$  denotes population size of sensitive strain and  $p_{S \rightarrow R}$  is  
377 probability of a treatment developing resistance, which is calculated from the results  
378 of simulations,  $\psi_R$  is the growth rate of resistant strain. Our hazard function calculates  
379 the average proportion of resistant population under certain treatment dose and  
380 duration.

381

382 *Implementation*



383 The analysis was performed in R (v. 3.1.3&v. 3.2.2) (46) using RSTUDIO (v.  
384 0.98.1103&0.99.903)<sup>35</sup>. The code is available upon request.

### 385 **Acknowledgements**

386

387 We are grateful to Olivia Judson and Sebastian Bonhoeffer for comments on the  
388 manuscript.

389

390 **Funding:** GY was funded by the China Scholarship Council, DB was funded by ETH  
391 grant (ETH-41 15-2) to RRR. JR was supported by the European Research Council  
392 (EVORESIN 260986).

393

394 **Author contributions:** All authors participated in the design and interpretation of the  
395 results. GY was primarily responsible for the predictive modelling, DYB for the  
396 PDwork. All authors contributed to the writing of the paper. JR wrote the first draft,  
397 RRR led the mathematical work.

398

399 **Competing interests:** None of the authors has competing interests.

400

401 **Data and materials availability:** The model will be made available as a remarkup  
402 document for use.

403

404

### 405 **References**

406

407 1. Laxminarayan R, Sridhar D, Blaser M, Wang M, Woolhouse M (2016)

- 408           Achieving global targets for antimicrobial resistance. *Science* (80- ) 353: 874-  
409           875..
- 410    2.        McClure NS, Day T (2014) A theoretical examination of the relative  
411           importance of evolution management and drug development for managing  
412           resistance. *Proc Biol Sci* 281: 20141861.
- 413    3.        World Health Organization (2014) The evolving threat of antimicrobial  
414           resistance: Options for action. *WHO Publ*:1–119.
- 415    4.        Czaplewski L et al. (2016) Alternatives to antibiotics — a pipeline portfolio  
416           review. *Lancet Infect Dis* 16:239-251.
- 417    5.        Zasloff M (2002) Antimicrobial peptides of multicellular organisms. *Nature*  
418           415:389–395.
- 419    6.        Hancock REW, Sahl H-G (2006) Antimicrobial and host-defense peptides as  
420           new anti-infective therapeutic strategies. *Nat Biotechnol* 24:1551–7..
- 421    7.        Jochumsen N et al. (2016) The evolution of antimicrobial peptide resistance in  
422           *Pseudomonas aeruginosa* is shaped by strong epistatic interactions. *Nat*  
423           *Commun* 7:13002.
- 424    8.        Fjell CD, Hiss JA, Hancock REW, Schneider G (2012) Designing  
425           antimicrobial peptides: form follows function. *Nat Rev Drug Discov* 11:37–51.
- 426    9.        Ling LL et al. (2015) A new antibiotic kills pathogens without detectable  
427           resistance. *Nature*. 517:455–459
- 428    10.       Yu G, Baeder DY, Regoes RR, Rolff J (2016) Combination Effects of  
429           Antimicrobial Peptides. *Antimicrob Agents Chemother* 60:AAC.02434-15.
- 430    11.       Mohamed AF, Cars O, Friberg LE (2014) A  
431           pharmacokinetic/pharmacodynamic model developed for the effect of colistin  
432           on *Pseudomonas aeruginosa* in vitro with evaluation of population

- 433 pharmacokinetic variability on simulated bacterial killing. *J Antimicrob*  
434 *Chemother* 69:1350–1361.
- 435 12. Firsov AA et al. (2013) Bacterial resistance studies using in vitro dynamic  
436 models: The predictive power of the mutant prevention and minimum  
437 inhibitory antibiotic concentrations. *Antimicrob Agents Chemother* 57:4956–  
438 4962.
- 439 13. Drlica K, Zhao X (2007) Mutant selection window hypothesis updated. *Clin*  
440 *Infect Dis* 44:681–8.
- 441 14. Gullberg E et al. (2011) Selection of Resistant Bacteria at Very Low  
442 Antibiotic Concentrations. *PLoS Pathog* 7:e1002158.
- 443 15. Cui J et al. (2006) The mutant selection window ub Rabbits Infected with  
444 *Staphylococcus aureus*. *J Infect Dis* 194:1601–1608.
- 445 16. Fantner GE, Barbero RJ, Gray DS, Belcher AM (2010) Kinetics of  
446 antimicrobial peptide activity measured on individual bacterial cells using  
447 high-speed atomic force microscopy. *Nat Nanotechnol* 5:280–5.
- 448 17. Rodríguez-Rojas A, Makarova O, Rolff J (2014) Antimicrobials, Stress and  
449 Mutagenesis. *PLoS Pathog* 10:e1004445.
- 450 18. Rodríguez-Rojas A, Makarova O, Müller U, Rolff J (2015) Cationic Peptides  
451 Facilitate Iron-induced Mutagenesis in Bacteria. *PLOS Genet* 11:e1005546.
- 452 19. Kohanski M, DePristo M, Collins JJ (2010) Sublethal antibiotic treatment  
453 leads to multidrug resistance via radical-induced mutagenesis. *Mol Cell*  
454 37:311–20.
- 455 20. Regoes RR et al. (2004) Pharmacodynamic Functions : a Multiparameter  
456 Approach to the Design of Antibiotic Treatment Regimens. *Antimicrob Agents*  
457 *Chemother* 48:3670–3676.

- 458 21. Shen L et al. (2008) Dose-response curve slope sets class-specific limits on  
459 inhibitory potential of anti-HIV drugs. *Nat Med* 14:762–766.
- 460 22. Bonapace CR, Friedrich L V., Bosso JA, White RL (2002) Determination of  
461 antibiotic effect in an in vitro pharmacodynamic model: Comparison with an  
462 established animal model of infection. *Antimicrob Agents Chemother* 46:3574–  
463 3579.
- 464 23. Corvaisier S et al. (1998) Comparisons between antimicrobial  
465 pharmacodynamic indices and bacterial killing as described by using the Zhi  
466 model. *Antimicrob Agents Chemother* 42:1731–1737.
- 467 24. Craig WA (1998) Pharmacokinetic / Pharmacodynamic Parameters : Rationale  
468 for Antibacterial Dosing of Mice and Men Author. *Clin Infect Dis* 26:1–10.
- 469 25. Nielsen EI, Friberg LE (2013) Pharmacokinetic-Pharmacodynamic Modeling  
470 of Antibacterial Drugs. *Pharmacol Rev*:1053–1090.
- 471 26. Sy SKB, Derendorf H (2014) in *Applied Pharmacometrics*, eds S S, Derendorf  
472 H (American Association of Pharmaceutical Scientists), pp 229–257.
- 473 27. AV H (1910) The possible effects of the aggregation of the molecules of  
474 hæmoglobin on its dissociation curves. *J Physiol* 40:4–7.
- 475 28. Melnyk AH, Wong A, Kassen R (2014) The fitness costs of antibiotic  
476 resistance mutations. *Evol Appl* 8:273–283
- 477 29. Day T, Read AF (2016) Does High-Dose Antimicrobial Chemotherapy  
478 Prevent the Evolution of Resistance? *PLOS Comput Biol* 12:e1004689.
- 479 30. Andersson DI, Hughes D, Kubicek-Sutherland JZ (2016) Mechanisms and  
480 consequences of bacterial resistance to antimicrobial peptides. *Drug Resist*  
481 *Updat* 26:43–57.
- 482 31. Chevereau G et al. (2015) Quantifying the Determinants of Evolutionary

- 483 Dynamics Leading to Drug Resistance. *PLOS Biol* 13:e1002299. A
- 484 32. Pena-Miller R et al. (2013) When the Most Potent Combination of Antibiotics  
485 Selects for the Greatest Bacterial Load : The Smile-Frown Transition. *PLoS*  
486 *Biol* 11:e1001540.
- 487 33. Perron GG, Zasloff M, Bell G (2006) Experimental evolution of resistance to  
488 an antimicrobial peptide. *Proc Biol Sci* 273:251–6.
- 489 34. Habets MGJL, Brockhurst M a(2012) Therapeutic antimicrobial peptides may  
490 compromise natural immunity. *Biol Lett* 8:416–8.
- 491 35. Dobson AJ, Purves J, Kamysz W, Rolff J (2013) Comparing Selection on *S.*  
492 *aureus* between Antimicrobial Peptides and Common Antibiotics. *PLoS One*  
493 8:e76521.
- 494 36. Joo H-S, Fu C, Otto M (2016) Bacterial Strategies of Resistance to  
495 Antimicrobial Peptides. *Phil Trans R Soc B* 371:20150291
- 496 37. Barbosa C et al. (2017) Alternative evolutionary paths to bacterial antibiotic  
497 resistance cause distinct collateral effects. *Mol Biol Evol*:1–16.
- 498 38. Bell G (2003) Arming the enemy: the evolution of resistance to self-proteins.  
499 *Microbiology* 149:1367–1375.
- 500 39. Akademie der Wissenschaften Hamburg (2013) *Antibiotika-Forschung:*  
501 *Probleme und Perspektiven* (Walter de Gruyter).
- 502 40. Imamovic L, Sommer MO (2013) Use of collateral sensitivity networks to  
503 design drug cycling protocols that avoid resistance development. *Sci Transl*  
504 *Med* 5:204ra132.
- 505 41. Holmes AH et al. (2016) Understanding the mechanisms and drivers of  
506 antimicrobial resistance. *Lancet* 387:176–187.
- 507 42. Rosenbloom DIS, Hill AL, Rabi SA, Siliciano RF, Nowak M (2012)

- 508 Antiretroviral dynamics determines HIV evolution and predicts therapy  
509 outcome. *Nat Med* 18:1378–1385.
- 510 43. Mouton JW, Dudley MN, Cars O, Derendorf H, Drusano GL (2005)  
511 Standardization of pharmacokinetic/pharmacodynamic (PK/PD) terminology  
512 for anti-infective drugs: An update. *J Antimicrob Chemother* 55:601–607.
- 513 44. Melnyk AH, Wong A, Kassen R (2015) The fitness costs of antibiotic  
514 resistance mutations. *Evol Appl* 8:273–283.
- 515 45. Pineda-Krch M (2008) GillespieSSA : Implementing the Stochastic Simulation  
516 Algorithm in R. *J Stat Softw* 25:1–18.
- 517 46. R. a language for statistical computing. Vienna 2015, A. R. F. for S. C. R: a  
518 language and for statistical computing. ([http://www. Rproject.org](http://www.Rproject.org)).

519

520

521

## 522 FIGURES

523

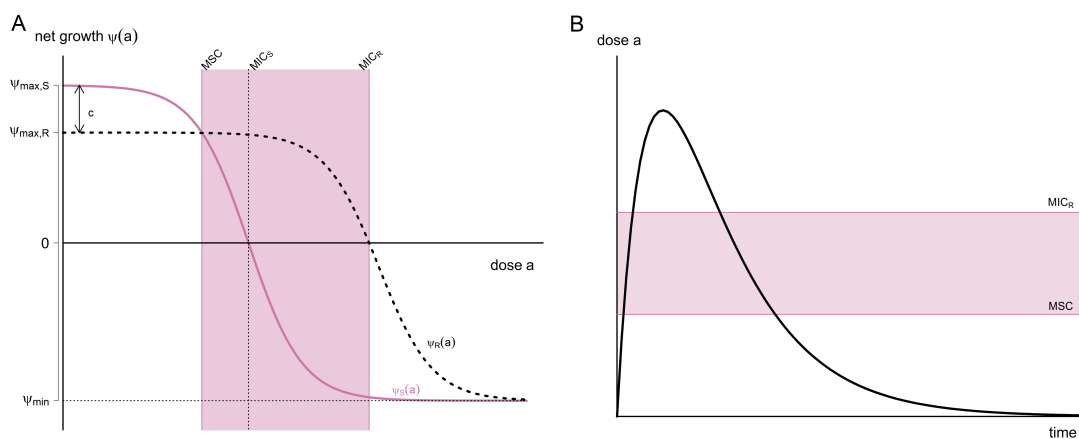

524

525

526

527 **Fig 1. The revised mutant selection window and pharmacodynamic parameters.**

528 **(a)** The mutant selection window (MSW) is defined as the antimicrobial concentration

529 range in which resistant mutants are selected (13). Following (14), we determine the

530 MSW using net growth curves of a susceptible strain  $S$  and a resistant strain  $R$ .

531 Mathematically, net growth is described with the pharmacodynamic function  $\psi(a)$

532 ((20), see Materials and Methods and Fig S3 for details). In short, the function

533 consists of the four pharmacodynamic parameters: net growth in absence of

534 antimicrobials  $\psi_{max}$ , net growth in the presence of a dose of antimicrobials, which

535 effects the growth maximal,  $\psi_{min}$ , the  $MIC$  and the parameter  $\kappa$ , which describes the

536 steepness of the pharmacodynamic curve. Here, the two pharmacodynamics functions

537  $\psi_S(a)$  (continuous pink line) and  $\psi_R(a)$  (dotted black line) describe the net growth

538 of the  $S$  and  $R$ , respectively, in relation to the drug concentration  $a$ . Cost of resistance

539  $c$  is included as a reduction of the maximum growth rate of the resistant strain

540  $\psi_{max,R}$ , with  $c = 1 - \psi_{max,R}/\psi_{max,S}$ . Note that with this definition, cost of

541 resistance is expressed as reduction in net growth rate in absence of antimicrobials (a

542 = 0). The lower bound of the MSW is the concentration for which the net growth rate

543 of the resistant strain is equal to the net growth rate of the sensitive strain and is called

544 the minimal selective concentration (MSC) (see Materials and Methods for analytic

545 solution, see Fig S1 for how the MSC is influenced by pharmacodynamic parameters

546 of the sensitive strain). The upper bound is given by the  $MIC$  of the resistant strain

547  $MIC_R$ . We calculate the size of the MSW as :  $size(MSW) = \frac{MIC_R}{MSC}$ . **(b)** The

548 boundaries of the MSW applied to the pharmacokinetics of the system.

549

550

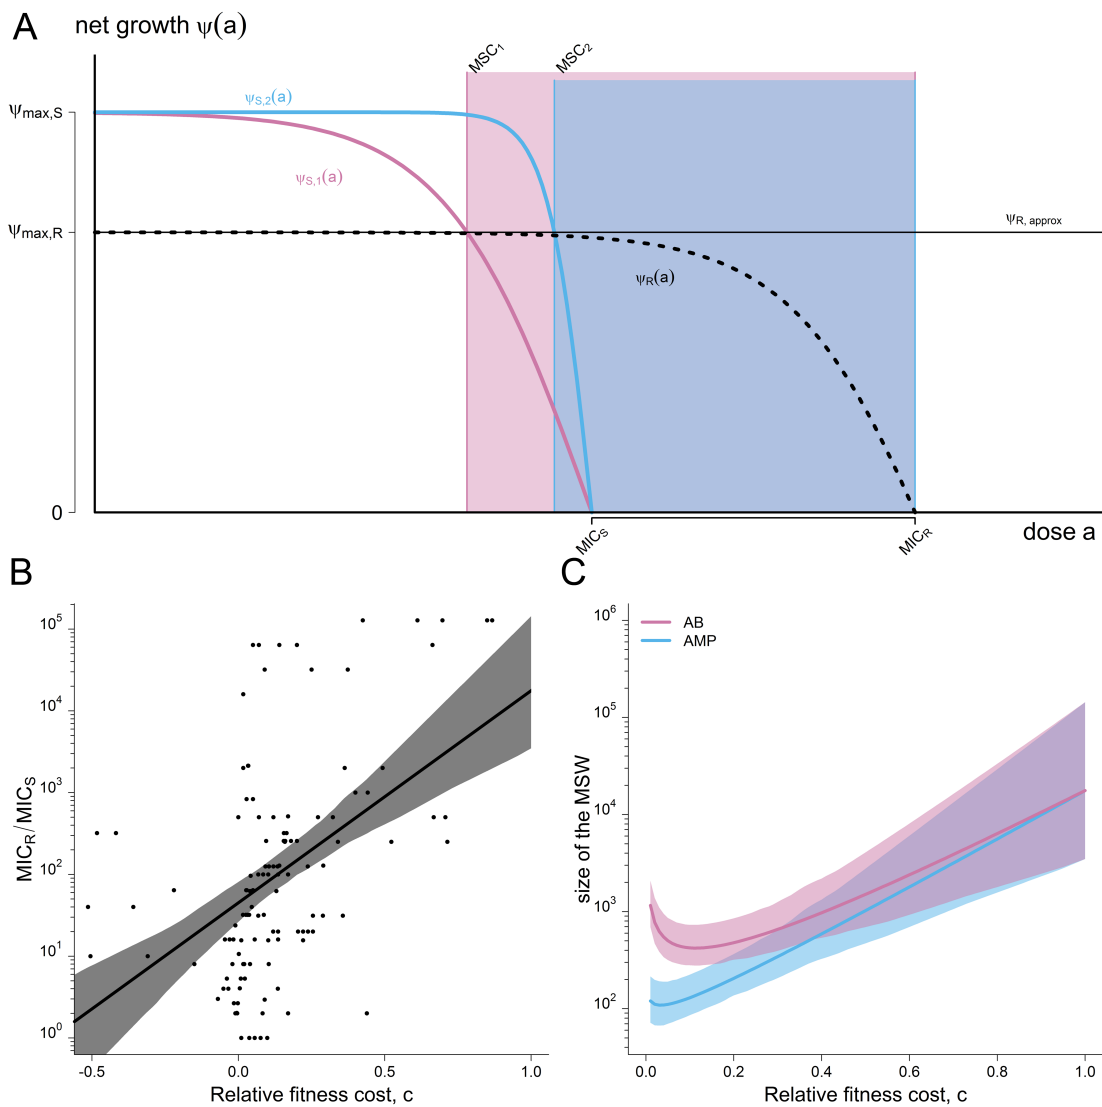

551

552

553 **Fig 2. The mutant selection window for arbitrary mutant strains.** The two

554 boundaries of the MSW, MSC and  $MIC_R$ , are influenced differently by the

555 pharmacodynamic parameters of the sensitive strain S and the resistant strain R. **(a)**

556 The lower boundary of the MSW (MSC) depends primarily on the pharmacodynamic

557 parameters of the sensitive strain, assuming that the net growth rate of the resistant

558 strain below the MSC is approximately at the same level as without antimicrobials:

559  $\psi_R(a) \approx \psi_{max,S}(1 - c) = \psi_{R,approx}$ , for  $0 < a < MSC$  ( $\psi_R$ : dotted black line;

560  $\psi_{R,approx}$ : continuous black line) (see Materials and Methods for details). The effect

561 of each of the four pharmacodynamic parameters and of the cost of resistance on the



562 MSC is depicted in Fig S1. We plotted the pharmacodynamic function  $\psi_S(a)$  of two  
563 sensitive strains with varying  $\kappa$  values:  $\psi_{S,1}(a)$  representative for Abs with a small  $\kappa$   
564 ( $\kappa = 1.5$ , pink) and  $\psi_{S,2}(a)$  representative for AMPs with a large  $\kappa$  ( $\kappa = 5$ , blue).  
565 Increasing the  $\kappa$  value results in increasing the MSC ( $MSC_1$  (pink)  $<$   $MSC_2$  (blue)). **(b)**  
566 The upper boundary of the MSW is per definition the  $MIC_R$ , which is linked to its  
567 fitness cost, i.e. the upper boundary  $MIC_R$  increases with costs  $c$  (data from(44)).  
568 Here, the log-linear regression and the 95% confidence interval are plotted. See  
569 materials and methods for details of the statistics. **(c)** The relationship between cost of  
570 resistance, other pharmacodynamic parameters, and the size of the MSW is complex.  
571 We show that because both boundaries of the MSW – the MSC and the  $MIC_R$  – are  
572 influenced by costs of resistance  $c$ , the lowest MSW window size is achieved at  
573 intermediate cost of resistance  $c$ . We plotted the size of the MSW (line) and the 95%  
574 confidence intervals for both AMP-like and AB-like pharmacodynamics, with  
575  $\psi_{max,S} = 1$ ,  $MIC_S = 1$ ,  $\psi_{min,S,AB} = -5$ ,  $\psi_{min,S,AMP} = -50$ ,  $\kappa_{S,AB} = 1.5$  and  
576  $\kappa_{S,AMP} = 5$ .  $\psi_{max,R}$  was calculated using the relationship  $\log_{10}(MIC_R/MIC_S) = 2,59 * c + 1,65$ .  
577  
578  
579

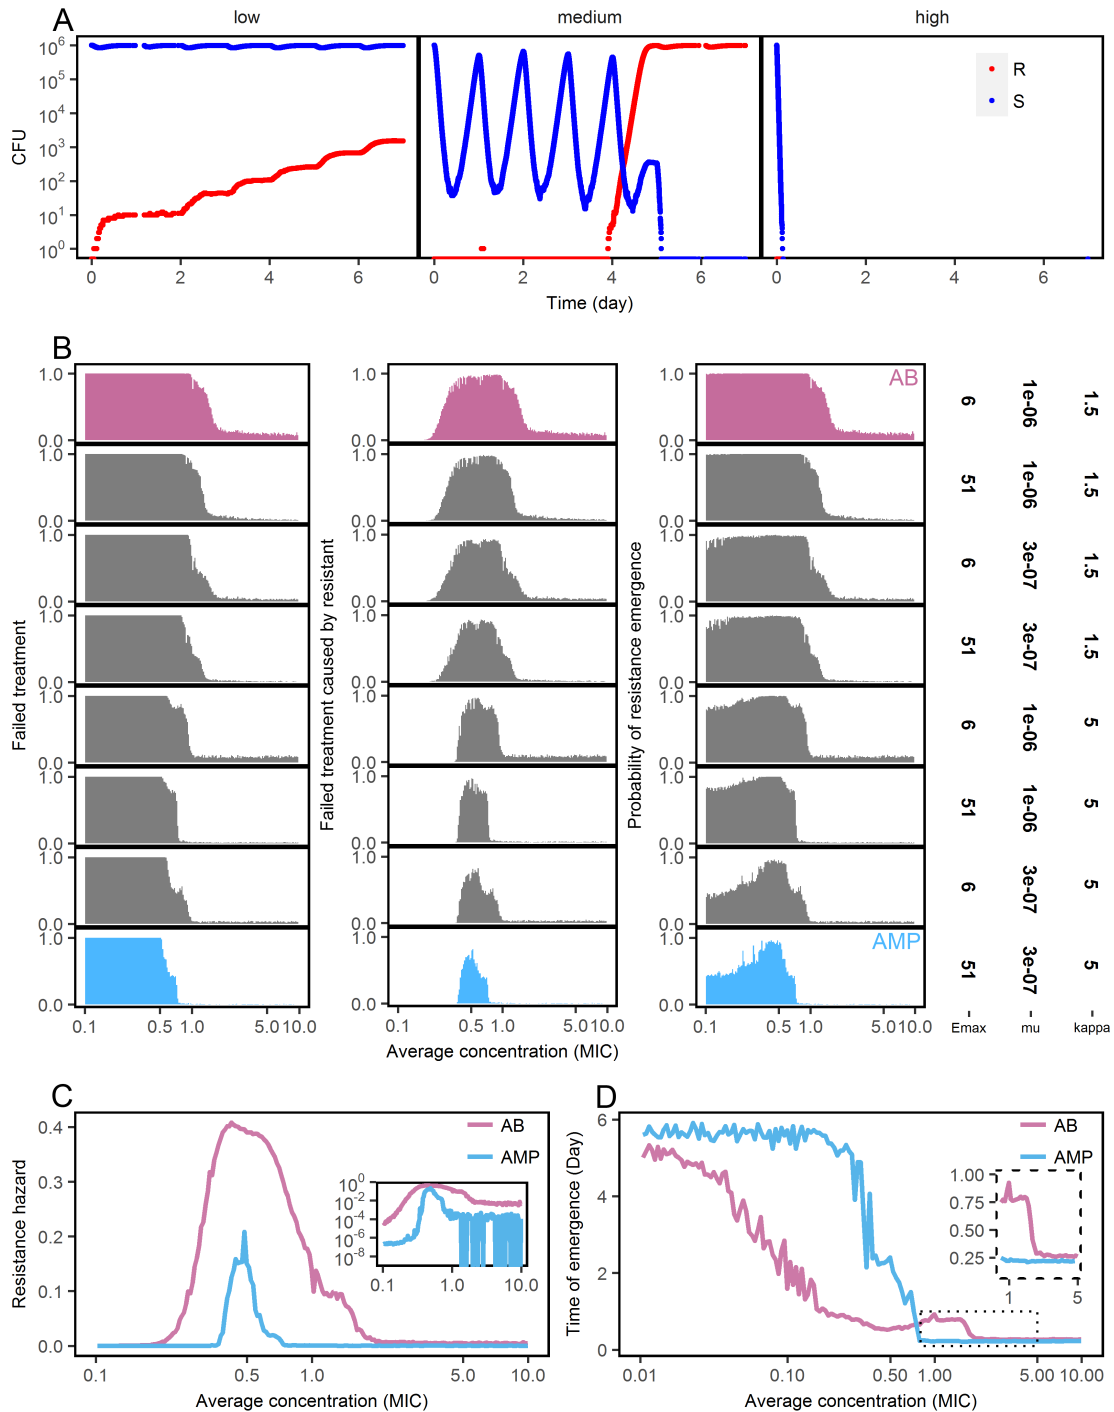

580

581

582 **Fig 3. Evolution of drug resistance determined by pharmacodynamics.**

583 (a) At high dose antimicrobials achieve maximal effects and rapidly kill most of the  
 584 population, preventing resistance evolution (left). At medium dose, the sensitive strain  
 585 will not be eliminated immediately, and resistant mutants emerge (central). At low

586 dose, the sensitive strain will not be removed, the mutants emerge as well, but will not  
587 quickly reach equilibrium due to substantial fitness costs (right, resistant: pink,  
588 susceptible: blue), **(b)** Simulations comparing the range from ‘pure’ antimicrobials  
589 peptides (AMP) to ‘pure’ antibiotics (AB) by altering  $\mu$ ,  $\psi_{min}$  and  $\kappa$ . We find that the  
590 probabilities of treatment failure (left), of failure caused by resistant strains (middle)  
591 and of resistance emergence are always higher under the AB-scenario than the AMP-  
592 scenario. A successful treatment requires less AMP than AB. **(c)** Following (29) we  
593 calculate the resistance hazard as the time-averaged proportion of mutants in a patient  
594 under a particular treatment dose. We find that AMPs are much less likely to select  
595 for resistance across concentrations than antibiotics (inset graph: a log-scale view).  
596 **(d)** Time to resistance is much longer under AMP than AB treatment when the  
597 average concentration is below MIC, but shorter around MIC and equal in higher  
598 concentrations (inset graph). The parameters are:  $\psi_{max,S} = 1$ ,  $\psi_{max,R} = 0.9$ ,  
599  $\kappa_{AB} = 1.5$ ,  $\kappa_{AMP} = 5$ ,  $\psi_{min,AB} = -5$ ,  $\psi_{min,AMP} = -50$ ,  $MIC_S = 10$ ,  $MIC_R =$   
600  $MIC_S * 10^{[2.59 * (\psi_{max,S} - \psi_{max,R}) + 1.65]}$ .  $\mu_{AB} = 10^{-6}$ ,  $\mu_{AMP} = 3 * 10^{-7}$ ,  $k_a =$   
601  $0.5$ ,  $k_e = 0.2$ ,  $d_n = 0.01$ ,  $\tau = 1/24$ .  
602 .  
603  
604  
605
